# Supplementary material
Source: publisher figshare collection journal article supplement (https://gsapubs.figshare.com/ndownloader/files/40861355)
Supplement: Supplementary file 1 [file 40861355]

## Sheet: SHRIMP U-Pb dating 
Table S1. U-Pb data of zircons from Miocene tuffaceous pyroclastic rocks and volcanic clasts-bearing breccias in the Angouran deposit
Spot	206Pbc (%)	U (ppm)	Th (ppm)	Th/U	206Pb (ppm)	SqidNum	207Pb/206Pb	%	207Pb/235U	%	206Pb/238U	%	err corr	206Pb/238U Age	1s	SqidEr
Miocene tuffaceous pyroclastic rock (sample AN13-22-1)
AN13-22-1-1.1	1.59981	1276.9	631.163	0.510739	3.04688	8	0.0456947	15.1694	0.0172195	15.2864	0.00273308	1.88749	0.123475	17.5945	0.331642	0.663285
AN13-22-1-2.1	2.17645	1670.64	658.945	0.407549	4.38462	23	0.0409296	19.1238	0.0168651	19.2128	0.00298848	1.8476	0.0961647	19.2362	0.354879	0.709757
AN13-22-1-3.1	1.0434	1034.51	323.602	0.323215	2.46819	10	0.0416402	19.1941	0.0157783	19.3038	0.00274819	2.05442	0.106426	17.6916	0.362963	0.725926
AN13-22-1-4.1	-0.533696	1292.75	483.025	0.386071	3.11838	15	0.0517853	7.59251	0.0201553	7.79738	0.00282281	1.77566	0.227725	18.1714	0.322207	0.644414
AN13-22-1-5.1	-0.720389	1113.66	438.756	0.407082	2.66405	12	0.0570801	7.09075	0.0220723	7.31669	0.00280454	1.8042	0.246587	18.0539	0.325273	0.650546
AN13-22-1-6.1	4.31176	793.183	523.563	0.682038	1.92593	5	0.0147551	24.3886	0.00550208	24.4671	0.00270447	1.95746	0.0800038	17.4106	0.340346	0.680691
AN13-22-1-7.1	-0.396598	977.12	345.912	0.365788	2.72277	26	0.0526485	6.69107	0.0236388	6.96653	0.00325641	1.93962	0.27842	20.958	0.405847	0.811694
AN13-22-1-8.1	-1.24408	493.399	110.137	0.230647	1.19949	20	0.0626484	14.0554	0.0247477	14.2775	0.00286499	2.50842	0.175691	18.4425	0.461956	0.923911
AN13-22-1-9.1	2.98415	777.14	212.24	0.28219	1.77022	3	0.0254573	12.5445	0.00902901	12.6942	0.00257233	1.94364	0.153113	16.561	0.321473	0.642947
AN13-22-1-10.1	-1.12187	963.998	373.288	0.400111	2.45179	24	0.0605421	12.423	0.0249901	12.6222	0.00299371	2.23367	0.176964	19.2698	0.429782	0.859563
AN13-22-1-11.1	2.13922	1212.03	626.873	0.534416	2.46608	2	0.0292854	26.1182	0.00935863	26.193	0.00231772	1.97846	0.0755338	14.9237	0.294917	0.589834
AN13-22-1-12.1	-0.820926	1347.09	542.874	0.416404	3.27698	18	0.0535269	4.47362	0.0210696	4.83819	0.00285485	1.8425	0.380824	18.3773	0.33812	0.67624
AN13-22-1-13.1	-0.606205	605.997	173.221	0.295354	1.46825	17	0.0572579	10.7889	0.0223999	11.0136	0.00283733	2.21357	0.200985	18.2647	0.403731	0.807462
AN13-22-1-14.1	1.22313	1740.3	1008.19	0.598595	4.22879	11	0.0369066	14.7	0.014217	14.7992	0.00279385	1.71062	0.115589	17.9852	0.307231	0.614461
AN13-22-1-15.1	2.15586	697.383	383.194	0.567754	1.66856	7	0.0198143	65.321	0.00744462	65.3718	0.00272497	2.57797	0.0394355	17.5424	0.451623	0.903247
AN13-22-1-16.1	0.21736	636.517	127.203	0.206491	1.50636	9	0.0495767	16.6628	0.0187893	16.8161	0.00274872	2.26511	0.134699	17.6951	0.400263	0.800527
AN13-22-1-17.1	1.03332	870.871	545.022	0.646655	2.12276	13	0.0409165	8.99191	0.0158413	9.19445	0.00280797	1.91922	0.208737	18.076	0.346432	0.692864
AN13-22-1-18.1	0.0158632	816.319	424.479	0.537291	1.97926	14	0.0496401	20.8818	0.0193137	21.0023	0.00282183	2.24714	0.106995	18.1651	0.40762	0.815239
AN13-22-1-19.1	0.343178	1082.4	1861.41	1.77691	8.34059	31	0.0456973	3.49615	0.0563203	3.75902	0.00893867	1.381	0.367383	57.3664	0.788716	1.57743
AN13-22-1-20.1	0.0597647	2448.2	2333.56	0.984882	6.28756	22	0.0456226	5.34825	0.0187937	5.53975	0.00298766	1.44396	0.260655	19.231	0.277274	0.554548
AN13-22-1-21.1	-0.190593	606.959	685.133	1.16635	4.43209	28	0.0495805	3.91077	0.0582164	4.24191	0.00851594	1.64307	0.387342	54.6649	0.894384	1.78877
AN13-22-1-22.1	-0.234275	1705.51	2751.96	1.66725	4.25957	21	0.0478249	4.16079	0.019215	4.43502	0.00291396	1.53535	0.346187	18.7573	0.287571	0.575143
AN13-22-1-23.1	-0.502346	1313.26	702.89	0.553031	3.21108	19	0.0521453	6.7723	0.020566	6.96799	0.00286044	1.63976	0.235328	18.4133	0.301502	0.603005
AN13-22-1-24.1	2.20777	8342.71	2552.48	0.316132	23.8205	25	0.0463863	7.21197	0.0207872	7.45541	0.00325016	1.88962	0.253456	20.9179	0.394627	0.789254
AN13-22-1-25.1	1.0222	1412.69	484.278	0.35421	3.28191	4	0.0433049	14.4819	0.0159813	14.5854	0.00267654	1.73418	0.118898	17.231	0.298418	0.596835
AN13-22-1-26.1	0.295166	97.8418	77.0935	0.814153	10.9326	33	0.0633502	2.97884	1.13272	3.3267	0.12968	1.48103	0.445195	786.038	10.9597	21.9194
AN13-22-1-27.1	0.763972	475.632	476.155	1.0344	3.66078	29	0.0399987	7.81936	0.0490316	7.98372	0.00889056	1.61163	0.201865	57.059	0.915523	1.83105
AN13-22-1-28.1	-0.370905	348.687	268.502	0.795654	2.07476	27	0.0548348	5.80442	0.0525599	6.2514	0.00695179	2.32135	0.371333	44.6591	1.03311	2.06622
AN13-22-1-29.1	1.09675	684.382	164.4	0.248208	1.35434	1	0.0359482	21.6928	0.0112921	21.82	0.00227822	2.35321	0.107846	14.6697	0.344816	0.689632
AN13-22-1-30.1	-0.121941	814.675	1001.82	1.27062	6.21767	30	0.0460027	2.84186	0.0564175	3.17585	0.00889465	1.41771	0.446402	57.0851	0.805726	1.61145
AN13-22-1-31.1	0.139404	201.656	32.3716	0.16587	15.7963	32	0.0621524	1.77344	0.780287	2.23839	0.0910532	1.36576	0.610154	561.763	7.34756	14.6951
AN13-22-1-32.1	1.09736	925.153	253.652	0.283294	2.18399	6	0.0379112	31.6776	0.0142059	31.7607	0.0027177	2.29642	0.0723039	17.4957	0.401229	0.802459
AN13-22-1-33.1	1.54104	713.149	389.784	0.56475	1.76084	16	0.0376768	21.7423	0.0147003	21.8454	0.00282977	2.12013	0.0970516	18.2161	0.385661	0.771323
Volcanic clasts-bearing breccia (sample AN14-7-9)
AN14-7-9-1.1	2.13253	702.018	401.037	0.590268	1.81874	1	0.036174	25.5945	0.0147203	25.6631	0.00295133	1.87512	0.0730669	18.9975	0.355701	0.711403
AN14-7-9-2.1	4.5308	323.282	146.117	0.467017	0.876972	2	0.0269604	73.6492	0.011206	73.7089	0.00301456	2.9642	0.040215	19.4039	0.574306	1.14861
AN14-7-9-3.1	0.762418	581.563	422.493	0.750645	1.55061	3	0.0422226	18.0992	0.0179302	18.1981	0.00307991	1.89534	0.10415	19.8239	0.375153	0.750306
AN14-7-9-4.1	1.86735e-29	605.016	450.979	0.770197	1.59332	4	0.0522926	6.73583	0.0221021	6.93653	0.00306543	1.6565	0.238809	19.7308	0.326342	0.652684
AN14-7-9-5.1	4.41869	339.315	242.904	0.739679	0.89903	5	0.0369107	52.0848	0.0150022	52.166	0.00294782	2.91079	0.0557985	18.9749	0.551506	1.10301
AN14-7-9-6.1	1.29321	410.925	220.006	0.553203	1.08486	6	0.0529998	11.5653	0.0221661	11.8888	0.00303329	2.75457	0.231694	19.5242	0.536994	1.07399
AN14-7-9-7.1	0.382374	1309.69	1021.23	0.805687	3.40229	7	0.0503307	4.71509	0.020904	4.98781	0.00301228	1.62669	0.326134	19.3892	0.314929	0.629858
AN14-7-9-13.1	1.86719e-29	705.086	235.397	0.344962	1.95374	13	0.0560614	5.18958	0.0249313	5.65981	0.00322537	2.25869	0.399076	20.7586	0.46812	0.93624
AN14-7-9-14.1	1.18632	923.352	310.205	0.347131	2.49517	14	0.0424163	7.60231	0.0181777	7.75229	0.00310818	1.51754	0.195754	20.0055	0.303121	0.606242
AN14-7-9-15.1	0.658315	1066.28	314.436	0.304701	2.90474	15	0.0497975	4.84646	0.0216288	5.06361	0.00315009	1.46693	0.289701	20.2749	0.296951	0.593902
AN14-7-9-16.1	1.35805	1094.46	552.057	0.52119	2.87175	16	0.0409765	14.461	0.0170216	16.3271	0.00301275	7.57988	0.464252	19.3923	1.4677	2.9354
AN14-7-9-17.1	1.73938	540.48	189.882	0.363008	1.47516	17	0.045211	9.69219	0.0194599	9.83019	0.00312174	1.64137	0.166972	20.0927	0.329282	0.658564
AN14-7-9-18.1	1.58189	548.297	121.706	0.229355	1.56531	18	0.0398627	12.4348	0.0179756	12.547	0.0032705	1.67416	0.133431	21.0486	0.351812	0.703624
AN14-7-9-19.1	0.784972	1027.47	451.787	0.454335	2.65801	19	0.0413488	12.4401	0.0170327	12.5507	0.00298758	1.66234	0.13245	19.2305	0.3192	0.638401
AN14-7-9-20.1	0.142044	703.722	250.734	0.368149	8.20899	20	0.0488916	3.0155	0.0914036	3.494	0.013559	1.76488	0.505117	86.8197	1.52199	3.04398
AN14-7-9-21.1	0.312389	642.174	234.304	0.376998	7.24608	21	0.0468416	3.24068	0.0845631	3.53252	0.0130933	1.40594	0.398	83.8568	1.17134	2.34268
AN14-7-9-22.1	0.244978	650.513	240.696	0.382318	7.38834	22	0.0487845	3.32849	0.0887084	3.60492	0.0131881	1.38442	0.384037	84.4601	1.16166	2.32332
AN14-7-9-23.1	0.345244	488.137	182.349	0.385988	5.54188	23	0.0476984	3.40683	0.0866114	3.69266	0.0131695	1.42452	0.385771	84.342	1.19364	2.38729
AN14-7-9-24.1	1.38691	185.264	116.552	0.650042	2.15307	24	0.0466293	8.07314	0.0857666	8.23343	0.0133401	1.61668	0.196356	85.4271	1.37198	2.74395
AN14-7-9-25.1	1.84474	780.817	337.032	0.445999	2.14721	25	0.0368108	21.7026	0.0159467	21.7767	0.00314193	1.7948	0.0824183	20.2224	0.362383	0.724766
AN14-7-9-26.1	0.609018	787.388	459.416	0.602878	9.06327	26	0.0519403	4.59361	0.0953685	4.80478	0.0133168	1.40877	0.293202	85.2789	1.19347	2.38695
AN14-7-9-27.1	0.20831	1805.67	844.516	0.483262	20.9978	27	0.0490624	2.25486	0.0913768	2.63342	0.0135078	1.36032	0.51656	86.4943	1.16874	2.33748
AN14-7-9-28.1	1.85677e-29	1724.22	511.546	0.306553	20.6234	28	0.0477869	1.66168	0.091735	2.1472	0.0139228	1.3599	0.633334	89.1328	1.20377	2.40755
AN14-7-9-29.1	0.138464	605.472	222.635	0.379938	6.83246	29	0.048429	3.24186	0.0875881	3.53758	0.0131171	1.4159	0.400246	84.0085	1.18176	2.36352
AN14-7-9-30.1	0.306453	722.06	282.321	0.404001	8.1844	30	0.0502921	3.13998	0.0912091	4.85827	0.0131534	3.7072	0.76307	84.2393	3.1026	6.2052
AN14-7-9-31.1	0.269239	1323.35	691.785	0.540143	15.6811	31	0.0507335	2.86176	0.0962238	3.17713	0.0137558	1.38003	0.434363	88.0713	1.20714	2.41429
AN14-7-9-32.1	1.86732e-29	297.029	162.415	0.564987	0.788323	32	0.0600985	7.50509	0.0255992	7.7177	0.00308931	1.79905	0.233107	19.8843	0.357176	0.714353
AN14-7-9-33.1	1.34672	1061.99	253.038	0.246194	2.814	33	0.040374	14.542	0.0169385	14.6325	0.00304279	1.62506	0.111058	19.5853	0.317789	0.635579
AN14-7-9-34.1	1.95396	731.805	285.127	0.402583	1.75427	34	0.0391885	10.0815	0.0147825	14.8674	0.00273582	10.9271	0.734973	17.6121	1.92188	3.84375
AN14-7-9-35.1	1.94914	308.93	140.827	0.471018	0.843318	35	0.0566792	13.9115	0.024348	14.0482	0.00311558	1.95504	0.139166	20.0531	0.391437	0.782873
AN14-7-9-36.1	0.246079	104.506	47.1051	0.465735	15.3129	36	0.0726984	2.06667	1.70541	2.56007	0.170138	1.51091	0.590184	1012.87	14.1619	28.3239
AN14-7-9-37.1	1.07019	39.6959	57.9142	1.50748	3.40383	37	0.0538336	9.27916	0.732925	9.4672	0.0987427	1.87754	0.19832	607.037	10.8772	21.7544
AN14-7-9-38.1	2.76993	85.832	156.658	1.88589	1.00887	38	0.0487907	13.5003	0.0894917	13.6351	0.0133028	1.91252	0.140264	85.1902	1.61856	3.23712
AN14-7-9-39.1	0.0256394	1390.61	307.93	0.228801	117.522	39	0.0595556	1.62894	0.807574	3.20565	0.0983463	2.76093	0.86127	604.711	15.9365	31.873
AN14-7-9-39.2	1.10291	143.564	18.1674	0.130756	1.64583	40	0.0448276	10.9461	0.081569	11.0775	0.0131971	1.70117	0.15357	84.5175	1.42841	2.85681
AN14-7-9-40.1	1.16644	599.001	283.864	0.489661	1.56631	41	0.0454318	11.3454	0.0188439	11.4652	0.00300822	1.65299	0.144175	19.3631	0.31959	0.63918
AN14-7-9-41.1	2.2545	603.863	286.626	0.490445	1.6136	42	0.0373981	13.8312	0.015677	13.9285	0.00304026	1.64351	0.117996	19.5691	0.321132	0.642264
AN14-7-9-42.1	1.79809e-29	1151.46	937.052	0.840869	73.3696	43	0.0586091	0.773308	0.599364	1.54928	0.0741693	1.34248	0.866521	461.225	5.97554	11.9511
AN14-7-9-43.1	0.0216888	1038.93	471.266	0.468695	72.1853	44	0.0579827	0.826131	0.646431	1.63429	0.080858	1.41011	0.862827	501.242	6.80024	13.6005
AN14-7-9-44.1	2.69998	150.201	64.4586	0.443424	1.75112	45	0.0461504	20.7804	0.0840209	20.8735	0.0132042	1.96893	0.0943269	84.5624	1.6541	3.3082
AN14-7-9-45.1	2.17198	102.643	107.636	1.08353	1.24134	46	0.0546912	10.0675	0.103849	10.2258	0.0137716	1.79217	0.17526	88.1714	1.56943	3.13885
AN14-7-9-46.1	0.278614	285.505	328.699	1.18959	3.31872	47	0.0465604	5.29817	0.0866204	5.50697	0.0134928	1.50204	0.272752	86.3985	1.28908	2.57816
AN14-7-9-47.1	7.28938	186.598	344.45	1.90735	2.60308	48	0.103564	19.5372	0.214969	19.7395	0.0150545	2.81835	0.142777	96.3242	2.69457	5.38913
AN14-7-9-48.1	0.0337657	324.953	139.488	0.443535	23.8298	49	0.057778	2.01506	0.679786	2.44384	0.0853314	1.38272	0.565798	527.867	7.00809	14.0162
AN14-7-9-49.1	1.86572e-29	37.4138	7.7277	0.213418	0.152217	50	0.0938309	13.4341	0.0612683	14.1412	0.00473575	4.4157	0.312257	30.4565	1.3417	2.6834
AN14-7-9-50.1	0.0238414	1535.17	893.215	0.601189	121.054	51	0.0581727	0.614695	0.73603	1.50739	0.0917645	1.37636	0.913077	565.964	7.45755	14.9151
AN14-7-9-51.1	0.813588	223.535	124.335	0.574725	2.57269	52	0.0469858	6.07438	0.0860833	6.32479	0.0132877	1.76208	0.278599	85.0941	1.48958	2.97915
AN14-7-9-52.1	24.7288	107.657	92.7358	0.890054	1.70879	53	0.058869	72.047	0.112881	72.2427	0.0139069	5.31438	0.0735629	89.0321	4.69898	9.39797
AN14-7-9-53.1	0.574103	418.2	135.448	0.334658	4.45853	54	0.0522832	3.9978	0.088946	7.78252	0.0123385	6.67722	0.857976	79.0525	5.24628	10.4926
AN14-7-9-54.1	2.13022	161.803	73.1533	0.467155	3.25658	55	0.0513016	12.8272	0.162186	12.9389	0.0229288	1.69668	0.131129	146.139	2.45162	4.90323
AN14-7-9-55.1	0.427851	755.389	242.502	0.331709	2.06872	56	0.0513198	6.68124	0.02246	6.85225	0.00317413	1.52132	0.222018	20.4294	0.310304	0.620609
AN14-7-9-56.1	0.423798	710.122	288.664	0.420021	7.91823	57	0.0518698	4.07801	0.092432	4.30635	0.0129243	1.38367	0.32131	82.7815	1.1381	2.27621
AN14-7-9-57.1	0.269015	838.973	459.013	0.565314	9.56156	58	0.0470912	2.56151	0.0859031	2.90615	0.0132302	1.37272	0.472349	84.7283	1.15547	2.31094
AN14-7-9-58.1	0.989672	564.768	243.293	0.445114	6.92428	59	0.0969249	3.3447	0.188833	3.70445	0.01413	1.59246	0.429877	90.4501	1.43032	2.86065
AN14-7-9-59.1	0.27387	1285.55	750.315	0.603072	3.63074	60	0.0479876	4.88724	0.0216922	5.1196	0.00327848	1.52487	0.29785	21.0999	0.321221	0.642441
AN14-7-9-60.1	0.956154	884.277	460.676	0.538295	2.33959	61	0.0435012	6.39994	0.0182952	6.57145	0.00305024	1.49152	0.22697	19.6332	0.292387	0.584774
Volcanic clasts-bearing breccia (sample AN14-7-11)
AN14-7-11-1.1	1.78164e-29	654.357	477.393	0.753831	51.1898	1	0.058521	0.923656	0.734748	1.64413	0.0910594	1.36016	0.82728	561.8	7.31786	14.6357
AN14-7-11-1.2	2.36515	66.0439	23.646	0.369946	0.7595	3	0.0409748	33.8349	0.0738371	33.9295	0.0130694	2.53173	0.0746174	83.7051	2.10549	4.21098
AN14-7-11-2.1	0.429957	438.579	163.245	0.384596	4.90564	2	0.0452102	5.31072	0.080811	5.5058	0.0129638	1.45261	0.263833	83.033	1.19841	2.39683
AN14-7-11-3.1	0.0647305	170.317	78.37	0.475449	12.7219	4	0.0578999	1.92159	0.69366	2.4037	0.0868894	1.44405	0.600762	537.115	7.44189	14.8838
AN14-7-11-3.2	0.821438	447.576	6.98281	0.0161204	5.0739	6	0.0440073	7.58301	0.07941	7.72411	0.0130873	1.46963	0.190266	83.8187	1.22385	2.44771
AN14-7-11-4.1	0.312497	228.336	138.147	0.625146	9.78441	5	0.0508466	3.06054	0.348595	3.38411	0.0497231	1.44404	0.426712	312.821	4.4094	8.81881
AN14-7-11-4.2	0.896142	402.399	26.052	0.0668955	4.61536	7	0.043269	5.37681	0.0789359	5.56531	0.0132311	1.4362	0.258063	84.7338	1.20899	2.41797
AN14-7-11-5.1	0.698777	257.371	18.6746	0.0749731	2.97429	8	0.0450139	7.17392	0.0829052	7.33579	0.0133578	1.53253	0.208912	85.5397	1.30227	2.60453
AN14-7-11-6.1	1.36019	241.199	18.5737	0.0795675	2.715	9	0.0403945	14.786	0.0719823	14.8807	0.0129242	1.67681	0.112683	82.7807	1.3792	2.7584
AN14-7-11-7.1	1.85727e-29	212.044	20.9015	0.101851	2.4423	10	0.048227	4.57317	0.0891501	4.8246	0.0134069	1.53714	0.318605	85.8525	1.31093	2.62185
AN14-7-11-8.1	0.743141	118.233	59.877	0.523278	4.12753	11	0.0545769	7.2302	0.303513	7.63496	0.0403336	2.45291	0.321274	254.901	6.13049	12.261
AN14-7-11-9.1	1.11709	263.471	17.8799	0.0701207	3.02642	12	0.0400865	11.3337	0.0730759	11.4441	0.0132213	1.58606	0.138592	84.6716	1.33416	2.66832
AN14-7-11-10.1	0.769575	79.7293	47.8509	0.620133	8.98711	13	0.0684252	4.87161	1.22835	5.12459	0.130198	1.59024	0.310316	788.993	11.8095	23.6189
AN14-7-11-11.1	0.869845	365.654	91.2934	0.257977	4.10957	14	0.0445622	9.55982	0.0796811	9.67804	0.0129684	1.50808	0.155825	83.0625	1.24461	2.48923
AN14-7-11-12.1	1.85751e-29	212.644	83.0143	0.403377	2.40532	15	0.0491693	4.56681	0.0892629	4.82231	0.0131667	1.54883	0.32118	84.3238	1.29753	2.59506
AN14-7-11-13.1	9.00283	1053.73	655.747	0.643013	12.6783	4	0.0370934	58.9887	0.06518	59.057	0.0127443	2.83867	0.0480667	81.6359	2.30277	4.60553
AN14-7-11-14.1	8.04101	723.935	197.806	0.282328	8.91593	9	0.0519375	45.1485	0.0944061	45.2478	0.0131831	2.99668	0.0662282	84.4285	2.51356	5.02711
AN14-7-11-15.1	3.01266	544.491	224.742	0.426488	6.07603	3	0.047947	21.1274	0.0832844	21.2241	0.012598	2.02339	0.0953345	80.7045	1.62279	3.24558
AN14-7-11-16.1	0.844213	1188.59	372.346	0.323689	13.833	16	0.0472646	5.62125	0.087538	5.78651	0.0134326	1.37307	0.237288	86.0156	1.17321	2.34642
AN14-7-11-17.1	0.723293	559.074	221.348	0.40909	6.32296	7	0.0524973	4.6657	0.0946003	4.91049	0.0130694	1.53108	0.311797	83.7047	1.2733	2.5466
AN14-7-11-18.1	1.07015	867.144	402.818	0.479988	9.84025	6	0.0460361	6.02061	0.0829467	6.18698	0.0130677	1.42509	0.230338	83.6941	1.18501	2.37002
AN14-7-11-19.1	3.85905	572.558	253.159	0.456864	6.85512	13	0.0623471	12.8861	0.11518	13.0094	0.0133986	1.78679	0.137346	85.7995	1.5229	3.0458
AN14-7-11-20.1	0.83767	527.182	151.878	0.297678	6.05071	10	0.0485735	8.78755	0.0887258	8.93507	0.013248	1.61693	0.180964	84.841	1.36283	2.72566
AN14-7-11-21.1	0.68083	647.397	274.216	0.437657	7.68812	20	0.0467817	8.09906	0.0885555	8.24923	0.013729	1.56687	0.189942	87.9007	1.36794	2.73589
AN14-7-11-22.1	-0.141052	1022.37	403.99	0.408295	11.6638	11	0.0518162	2.78737	0.095009	3.11935	0.0132983	1.40031	0.448912	85.1617	1.18469	2.36937
AN14-7-11-23.1	0.234521	638.219	182.806	0.29596	7.08209	5	0.0452249	6.12971	0.080354	6.31052	0.0128863	1.49976	0.237661	82.5398	1.23001	2.46002
AN14-7-11-24.1	0.202286	1277.81	921.565	0.7452	14.7284	12	0.0485386	3.95674	0.0896094	4.18441	0.0133895	1.36142	0.325356	85.7418	1.15958	2.31916
AN14-7-11-25.1	0.190125	1274.51	528.86	0.428755	14.7208	14	0.0470429	3.32712	0.0870389	3.59996	0.0134189	1.37475	0.38188	85.9288	1.17347	2.34694
AN14-7-11-26.1	0.865681	971.724	13.0796	0.013908	11.3659	18	0.0448498	3.04321	0.0834647	3.3593	0.0134971	1.4226	0.423481	86.4261	1.22129	2.44259
AN14-7-11-27.1	0.558447	1990.17	854.68	0.443737	23.4374	19	0.0456734	4.84924	0.0858437	5.0365	0.0136315	1.36058	0.270143	87.2808	1.17952	2.35904
AN14-7-11-28.1	0.882751	737.181	301.528	0.422636	8.36172	8	0.0439307	10.3515	0.0792676	10.4786	0.0130866	1.62726	0.155293	83.8144	1.35505	2.71011
AN14-7-11-29.1	0.291431	246.899	103.314	0.432366	14.9924	23	0.0594609	5.02923	0.577795	5.36381	0.0704759	1.86473	0.347651	439.022	7.91406	15.8281
AN14-7-11-30.1	0.630428	1345.5	512.075	0.393245	15.9839	21	0.043194	4.26895	0.0818342	4.48071	0.0137407	1.36117	0.303785	87.9755	1.18936	2.37873
AN14-7-11-31.1	5.16107	946.657	509.164	0.555748	11.5514	17	0.0440848	14.2835	0.0818793	14.3694	0.0134705	1.56882	0.109178	86.2569	1.3442	2.6884
AN14-7-11-32.1	0.0310516	274.738	185.821	0.698855	11.9695	22	0.0532811	3.45909	0.372438	3.74612	0.0506966	1.4381	0.383891	318.797	4.47311	8.94623
AN14-7-11-33.1	3.19434	849.865	368.824	0.448417	10.1154	15	0.0438134	14.1249	0.0810213	14.208	0.0134119	1.53438	0.107994	85.8842	1.30905	2.61811
AN14-7-11-34.1	2.50331	77.7071	74.9605	0.996746	7.95543	24	0.0558571	12.8188	0.894806	12.9455	0.116185	1.80686	0.139574	708.567	12.1243	24.2486
